# Supplementary material for: Phosphorus dopants triggered single-atom platinum catalysis for efficient hydrogen evolution in proton exchange membrane electrolyzers
Source: Royal Society of Chemistry journal article supplement (doi:10.1039/d4ta01738b), 2024-01-01
Supplement: d4ta01738b1.pdf [file d4ta01738b1.pdf]

Supporting Information

**Phosphorus Dopants Triggered Single-atom Platinum Catalysis  
for Efficient Hydrogen Evolution in Proton Exchange Membrane  
Electrolyzers**

Jin Peng<sup>a#</sup>, Zhen Wang<sup>a#</sup>, Kang Jiang<sup>a</sup>, Ming Peng<sup>a</sup>, Nithyadharseni Palaniyandy<sup>b</sup>, Jianwei Ren<sup>c</sup>, Yongwen  
Tan<sup>a\*</sup>

<sup>a</sup>College of Materials Science and Engineering, Hunan University, Changsha, Hunan 410082, China

<sup>b</sup>Institute for Catalysis and Energy Solutions (ICES), College of Science, Engineering, and Technology  
(CSET), University of South Africa, Florida Science Campus, Roodepoort, 1709, South Africa

<sup>c</sup>Department of Chemical Engineering, Faculty of Engineering, Built Environment and Information  
Technology, University of Pretoria , Hatfield 0028 , Pretoria, South Africa

<sup>#</sup>These authors contributed equally to this work

\*Corresponding author

E-mail: tanyw@hnu.edu.cn (Y. Tan)

15

16

17

18

19

20

21

22

## 1 Experimental section

### 2 Synthesis of Catalysts

#### 3 Synthesis of NPG:

4 NPG was obtained through etching away the Ag from Au<sub>35</sub>Ag<sub>65</sub> nanosheet by etching it for 8h in 30  
5 mL of 65-68% mass fraction HNO<sub>3</sub>.<sup>1,2</sup>

#### 6 Synthesis of np-MoS<sub>2</sub>:

7 The MoS<sub>2</sub>@NPG composite structure was synthesized by CVD in a three-zone tubular furnace.  
8 Subsequently, the MoS<sub>2</sub>@NPG composite structure was etched to remove NPG by KI-I<sub>2</sub> solution (24 mg  
9 I<sub>2</sub> and 12 mg KI dissolved in 100 mL deionized water) for 24 h to obtain np-MoS<sub>2</sub>.

#### 10 Synthesis of P/np-MoS<sub>2</sub>:

11 Subsequently, P/np-MoS<sub>2</sub> was synthesized by further CVD in a two-zone tubular furnace. 1.0 g of  
12 NaH<sub>2</sub>PO<sub>2</sub>·H<sub>2</sub>O was placed in the upstream position, and the obtained MoS<sub>2</sub>@NPG composite structure was  
13 placed in the downstream position, and the temperature zone where NaH<sub>2</sub>PO<sub>2</sub>·H<sub>2</sub>O located was  
14 subsequently heated to 300 °C at a rate of 3 °C min<sup>-1</sup> and held for 2 h under the conditions of 90 sccm of  
15 Ar and 10 sccm of H<sub>2</sub>, meanwhile the temperature zone where the MoS<sub>2</sub>@NPG composite structure located  
16 was heated to 500 °C at a rate of 5 °C min<sup>-1</sup> and held for 2 h. P/MoS<sub>2</sub>@NPG composite structure was  
17 obtained by natural cooling, followed by etching away the NPG to obtain P/np-MoS<sub>2</sub>.

#### 18 Synthesis of Pt<sub>SA</sub>, P/np-MoS<sub>2</sub>:

19 Initially, 2 mg of H<sub>2</sub>PtCl<sub>6</sub>·6H<sub>2</sub>O was dissolved in 50 mL of deionized water and stirred for 1 h to  
20 ensure uniform dispersion of H<sub>2</sub>PtCl<sub>6</sub>, followed by immersion of the obtained P/np-MoS<sub>2</sub> sheet into it at  
21 room temperature for 12 h. The obtained sheet was then transferred to carbon cloth and dried naturally at  
22 room temperature and atmospheric pressure for 10 h. Finally, the sheet was placed in a vacuum drying oven  
23 at 60 °C for 12 h to obtain the Pt<sub>SA</sub>, P/np-MoS<sub>2</sub>.

#### 24 Synthesis of Pt<sub>SA</sub>/np-MoS<sub>2</sub>:

1 A similar method was employed to transfer the np-MoS<sub>2</sub> sheet to the same concentration of H<sub>2</sub>PtCl<sub>6</sub>  
2 solution and then dried in the same process mentioned above to obtain a comparison sample of Pt<sub>SA</sub>/np-  
3 MoS<sub>2</sub>.

#### 4 **Structural characterizations**

5 The microscopic morphology of the prepared catalysts was identified by SEM (JEOL, JSM-  
6 7610FPlus) with a volt of 10 kV. HAADF-STEM and EELS of the as-obtained catalysts were characterized  
7 by TEM (Thermo Scientific, Themis Z) equipped with a focused ion beam (Thermo Scientific, Helios 5  
8 CX). The chemical structure and phase characteristics of all the samples are analyzed by Raman  
9 spectroscopy (Witec Alpha300R) with an excitation wavelength of 488 nm. The chemical state and  
10 electronic structure of the catalysts were carried out by XPS (Thermo Scientific ESCALAB250Xi  
11 spectrometer with the monochromatic Al K $\alpha$ ). ICP-OES was performed on an Agilent 730 to obtain the  
12 content of elements in the sample. The Pt L<sub>3</sub>-edge and Mo K-edge XAS spectra were probed at the beamline  
13 BL01C1 of National Synchrotron Radiation Research Center (NSRRC, NSRRC, Taiwan light source). The  
14 S K-edge XAS spectra were measured at the beamline BL16A1 of NSRRC.

#### 15 **Electrochemical measurements**

16 The HER performance of all the catalysts was evaluated by a three-electrode electrochemical system  
17 utilizing a CHI-760E electrochemical workstation in 0.5 M H<sub>2</sub>SO<sub>4</sub> (Sinopharm Chemical ReagentCo., Ltd,  
18 95.0 %-98.0 %) at room temperature, in which the standard Ag/AgCl (saturated KCl solution) electrode as  
19 the reference electrode<sup>3, 4</sup>, a graphite rod as the counter electrode and the nanoporous catalysts including  
20 np-MoS<sub>2</sub>, P/np-MoS<sub>2</sub>, Pt<sub>SA</sub>/np-MoS<sub>2</sub>, and Pt<sub>SA</sub>, P/np-MoS<sub>2</sub> with loading of 0.5 mg cm<sup>-2</sup> coated on the carbon  
21 cloth (1×1 cm<sup>2</sup>) as the working electrode. During the experiment, all the potentials were calibrated with a  
22 Reversible Hydrogen Electrode (RHE) according to the Nernst equation ( $E_{\text{RHE}} = E_{\text{Ag/AgCl}} + 0.0591 \times \text{pH} +$   
23  $0.197 \text{ V}$ ) and rectified manually via 95% iR compensation after the data collection ( $E_{\text{iR-corrected}} = E_{\text{original}} -$   
24  $95\% \times iR_s$ , in which  $i$  and  $R_s$  are the current density and solution resistance, respectively). Polarization  
25 curves were measured by LSV with a scan rate of 5 mV s<sup>-1</sup>, and the overpotentials of HER were evaluated

1 at a current density of 10 mA cm<sup>-2</sup>. Tafel curves were obtained based on the equation ( $\eta = b \times \log j + a$ , in  
2 which  $b$  and  $j$  are the Tafel slope and current density, respectively). In addition, LSV and Tafel curve  
3 extraction were also performed on Pt<sub>SA</sub>, P/np-MoS<sub>2</sub> at the scan rate of 1 mV s<sup>-1</sup> to explore the effect of  
4 steady-state responses on the Tafel slope.<sup>5</sup> EIS was conducted with an amplitude of 10 mV from 10<sup>6</sup> to 10<sup>-1</sup>  
5 Hz frequency range at the overpotential of 30 mV vs. RHE. The ECSA of catalysts was assessed by the C<sub>dl</sub>  
6 acquired from the relevant CV curves in the non-Faradaic potential region of 0.3 to 0.4 V with scan rates

7 from 10 to 100 mV s<sup>-1</sup>. ECSA was computed according to the equation ( $ECSA = \frac{C_{dl}}{C_s}$ , C<sub>s</sub> is the specific  
8 capacitance), where the value of C<sub>dl</sub> is half the slope of the line derived from linear fitting. It was found that  
9 the C<sub>s</sub> value on a flat surface is normally in the range of 20 to 60 μF cm<sup>-2</sup>. In this paper, the C<sub>s</sub> value was  
10 uniformly assumed as 60 μF cm<sup>-2</sup> based on reported values.<sup>6</sup> The mass activity, namely current density

11 normalized to the mass of Pt, was calculated based on the equation ( $j_{mass} = \frac{j}{m_{Pt}}$ ). The stability of the  
12 catalyst was tested by chronopotentiometry with an applied potential of 24 mV and 1000 CV cycles. The

13 Faradaic efficiency (FE) was calculated according to the equation ( $FE = \frac{n_e}{n_t}$ ), where  $n_e$  is the amount of  
14 experimentally determined H<sub>2</sub>,  $n_t$  is the theoretically expected H<sub>2</sub> from the reaction.  $n_t$  was calculated by

15 applying Faraday Law ( $n_t = \frac{JAt}{2F}$ ), where  $J$  is current density,  $A$  is the electrode area,  $t$  is time in seconds, 2

16 is number of the electrons, and  $F$  is the Faraday constant (96485.4 C/mol).<sup>7</sup> FE is conducted under  
17 galvanostatic electrolysis at a current density of -10 mA cm<sup>-2</sup>. H<sub>2</sub> generated from the reaction was collected  
18 by the water drainage method. The volume of H<sub>2</sub> produced was measured at different time intervals up to  
19 60 min.

20 The PEMWE was constructed by assembling a self-made battery consisting of two polymethyl  
21 methacrylate panels. The obtained sheet catalyst supported on Ti cloth (2 × 2 cm<sup>2</sup>) acted as the cathode.  
22 The commercial IrO<sub>2</sub> (20 wt%) sprayed on carbon cloth (2 × 2 cm<sup>2</sup>) acted as the anode. The anode and

1 cathode were adhered together with the Nafion 117 membrane by heat pressing with a pressure of 2 MPa  
 2 at 80 °C for 8 h as the membrane electrode in the PEMWE. All electrochemical tests were performed in 0.5  
 3 M H<sub>2</sub>SO<sub>4</sub> electrolyte.

4 The ECSA of np-MoS<sub>2</sub>, P/np-MoS<sub>2</sub>, Pt<sub>SA</sub>/np-MoS<sub>2</sub>, and Pt<sub>SA</sub>, P/np-MoS<sub>2</sub> were calculated as follow:

$$5 \quad A_{ECSA}^{np-MoS_2} = \frac{47 \text{ mF cm}^{-2}}{2 \times 60 \mu\text{F cm}^{-2} \text{ per cm}_{ECSA}^2} = 391.67 \text{ cm}_{ECSA}^2$$

$$6 \quad A_{ECSA}^{P/np-MoS_2} = \frac{71 \text{ mF cm}^{-2}}{2 \times 60 \mu\text{F cm}^{-2} \text{ per cm}_{ECSA}^2} = 591.67 \text{ cm}_{ECSA}^2$$

$$7 \quad A_{ECSA}^{Pt/np-MoS_2} = \frac{130 \text{ mF cm}^{-2}}{2 \times 60 \mu\text{F cm}^{-2} \text{ per cm}_{ECSA}^2} = 1083.33 \text{ cm}_{ECSA}^2$$

$$8 \quad A_{ECSA}^{Pt,P/np-MoS_2} = \frac{141 \text{ mF cm}^{-2}}{2 \times 60 \mu\text{F cm}^{-2} \text{ per cm}_{ECSA}^2} = 1175.00 \text{ cm}_{ECSA}^2$$

9 The mass activity of Pt<sub>SA</sub>/np-MoS<sub>2</sub>, Pt<sub>SA</sub>, P/np-MoS<sub>2</sub> and commercial Pt/C (20 wt%) were calculated  
 10 as follow:

$$11 \quad j_{mass}^{Pt_{SA}/np-MoS_2} = \frac{2.50 \text{ mA cm}^{-2}}{10.24 \text{ ug cm}^{-2}} = 0.24 \text{ A mg}^{-1}$$

$$12 \quad j_{mass}^{Pt_{SA},P/np-MoS_2} = \frac{61.17 \text{ mA cm}^{-2}}{10.24 \text{ ug cm}^{-2}} = 5.97 \text{ A mg}^{-1}$$

$$13 \quad j_{mass}^{Pt/C} = \frac{29.15 \text{ mA cm}^{-2}}{50.63 \text{ ug cm}^{-2}} = 0.58 \text{ A mg}^{-1}$$

#### 14 DFT calculations

15 All computations were conducted employing DFT methods using the Vienna Ab initio Simulation  
 16 Package (VASP 5.4.4)<sup>8, 9</sup>. The generalized gradient approximation of Perdew-Burke-Ernzerhof (GGA-  
 17 PBE) was used to describe the exchange-correlation function. The basis set utilized the projector-  
 18 augmented-wave pseudopotential (PAW) method, and the plane-wave energy cutoff was set at 500 eV<sup>10</sup>,  
 19 <sup>11</sup>. The MoS<sub>2</sub> of 2H or 1T were modeled by single-layer slabs with a (4×4) supercell, and the Monkhorst-  
 20 Pack k-point sampling in the Brillouin zone was set to a (3 × 3 × 1) for calculations. Convergence was

1 assumed when forces on each atom were less than 0.02 eV/Å and the self-consistent field (SCF) tolerance  
 2 was 10<sup>-6</sup> eV in the geometry optimization. To avoid the interactions between periodic structures, the  
 3 vacuum space was set to 20 Å. The DFT-D3 method with Grimme's scheme was employed to correct the  
 4 van der Waals interactions<sup>12</sup>. The Gibbs free energy of hydrogen adsorption ( $\Delta G_{ad}(*H)$ ) was calculated  
 5 by

$$G_{ad}(*H) = E(Slab + H) - E(Slab) - \frac{1}{2} * E(H_2) + \Delta ZPE - T\Delta S + \Delta H$$

6  
 7 where  $\Delta ZPE - T\Delta S + \Delta H$  for HER is about 0.24 eV<sup>13</sup>.

8  
 9  
 10

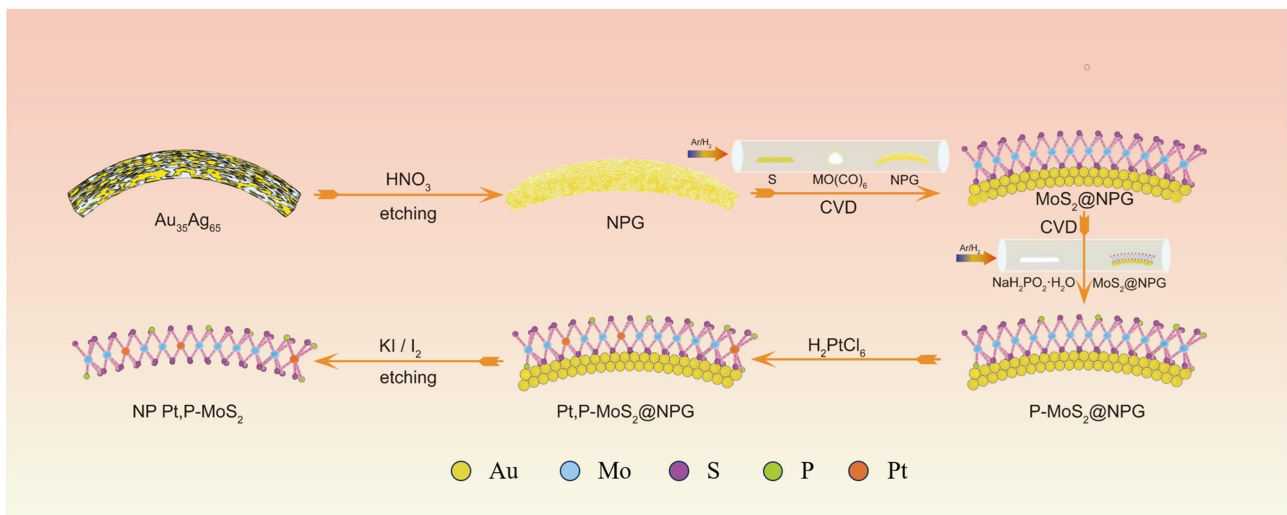

12 **Figure S1.** Schematic illustration of synthesis process for Pt<sub>SA</sub>, P/np-MoS<sub>2</sub>.  
 13  
 14  
 15

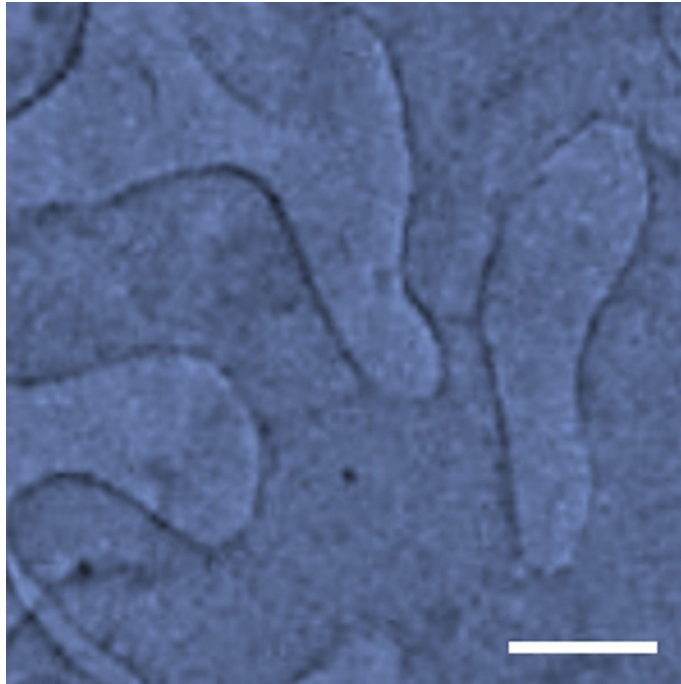

1

2 **Figure S2.** A typical TEM image of the as-prepared Pt<sub>SA</sub>, P/np-MoS<sub>2</sub>, showing the nanotube-shaped  
3 Ligaments. Scale bar: 200 nm.

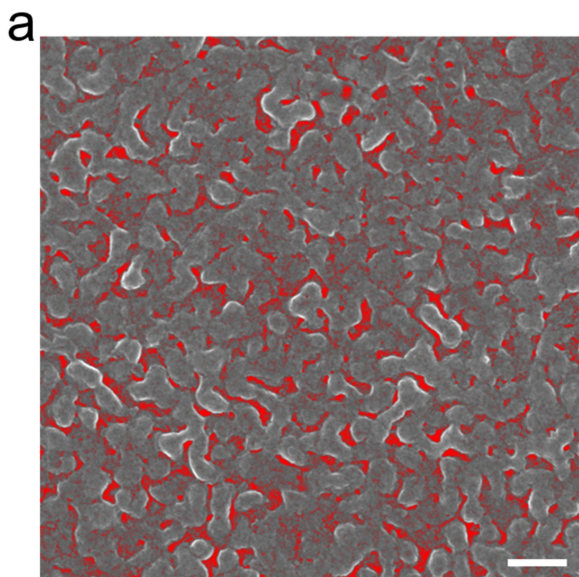

4

5 **Figure S3.** (a) A typical SEM image of the as-prepared Pt<sub>SA</sub>, P/np-MoS<sub>2</sub>. (b) The average pore diameter is  
6 measured to be 54 nm from (a). Scale bar: 100 nm.

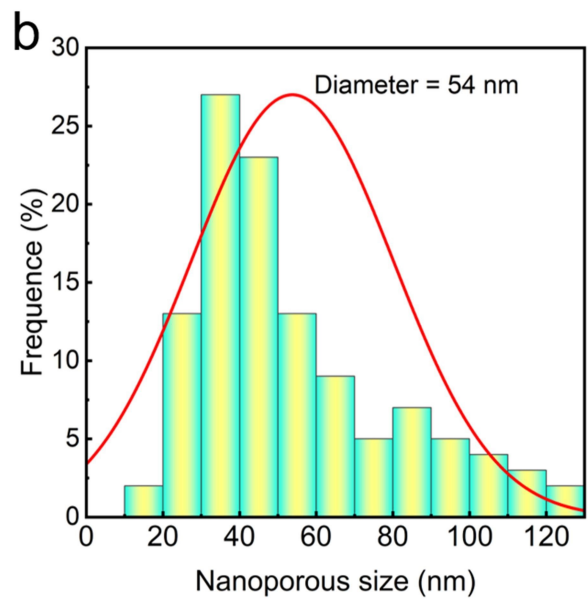

7

8

9

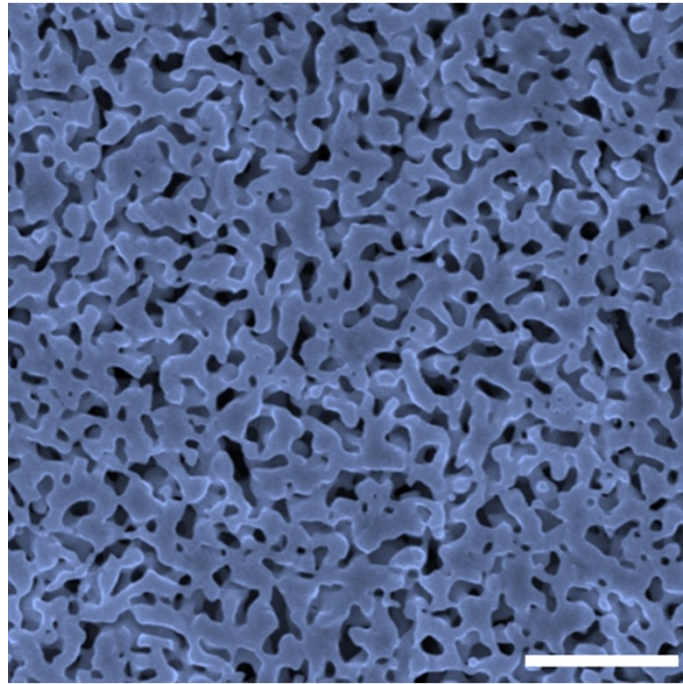

1

2 **Figure S4.** SEM characterizations of Pt<sub>SA</sub>, P/np-MoS<sub>2</sub>@NPG. Scale bar: 1  $\mu$ m.

3

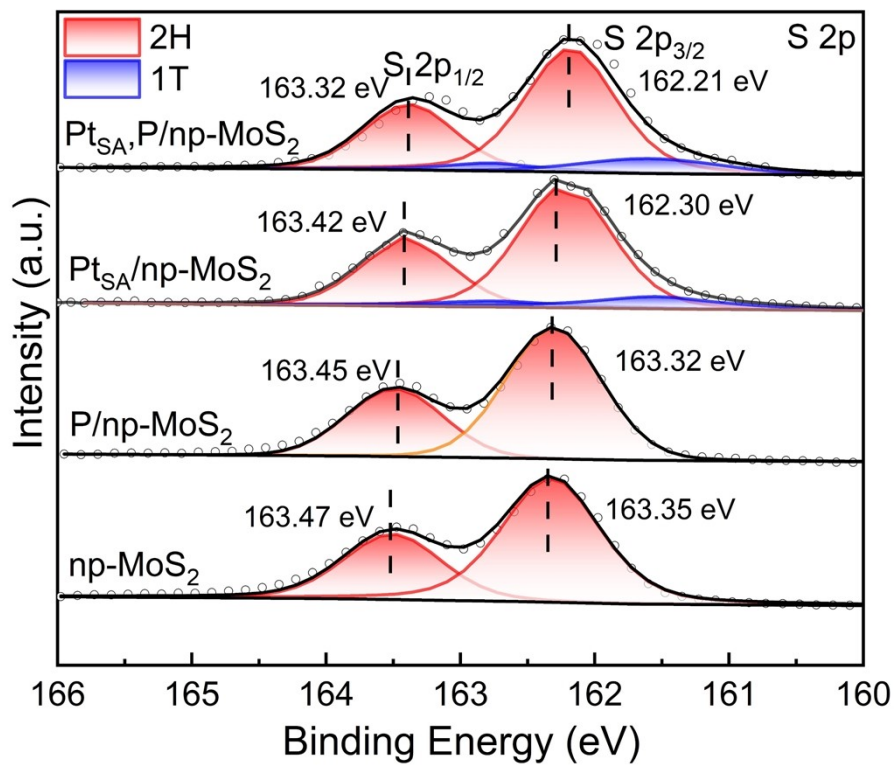

4

5 **Figure S5.** High-resolution XPS spectra of S 2p belong to np-MoS<sub>2</sub>, P/np-MoS<sub>2</sub>, Pt<sub>SA</sub>/np-MoS<sub>2</sub>, and Pt<sub>SA</sub>,

6 P/np-MoS<sub>2</sub>.

7



1  
2

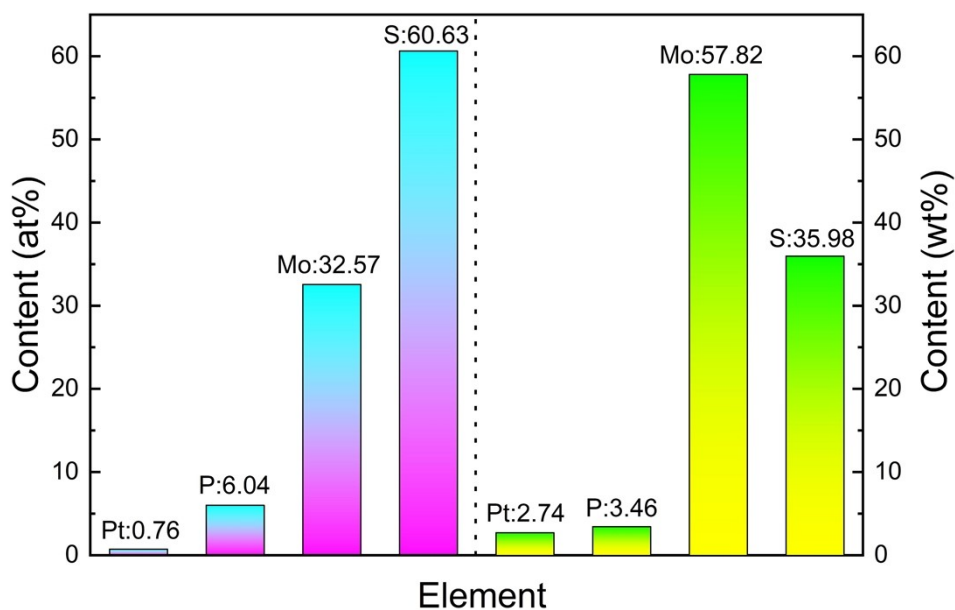

3

4 **Figure S6.** ICP-OES analysis of Pt<sub>SA</sub>, P/np-MoS<sub>2</sub>. The Pt content is very low.

5

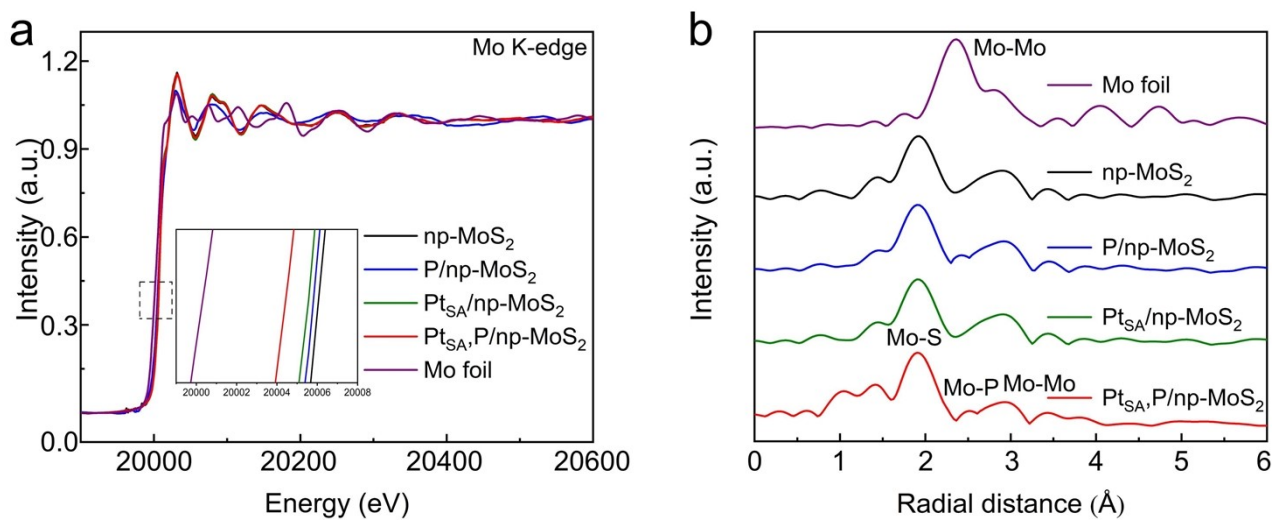

6

7 **Figure S7.** (a) Mo K-edge XANES spectra of np-MoS<sub>2</sub>, P/np-MoS<sub>2</sub>, Pt<sub>SA</sub>/np-MoS<sub>2</sub>, Pt<sub>SA</sub>, P/np-MoS<sub>2</sub>, and

8 Mo foil. (b) Corresponding FT-EXAFS spectra from (a).

9

10

11

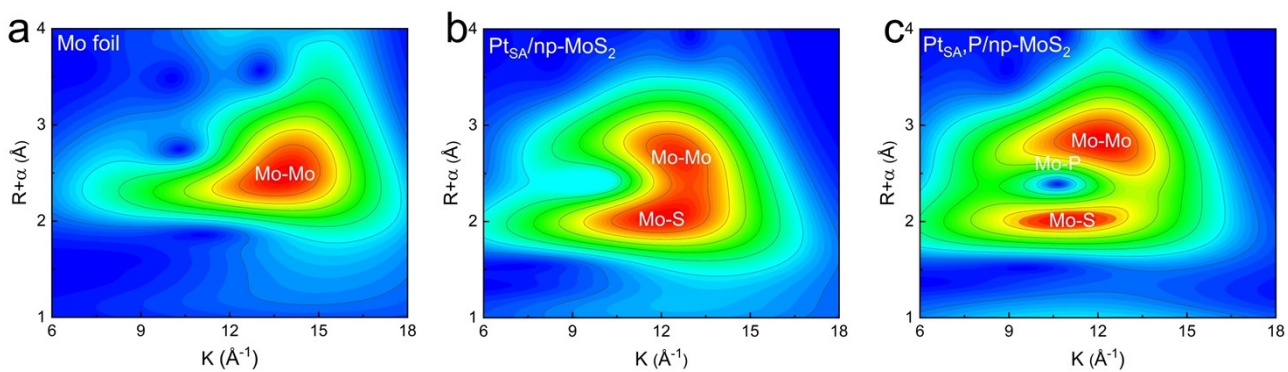

1  
2 **Figure S8.** Wavelet transforms of (a) Mo foil, (b) Pt<sub>SA</sub>/np-MoS<sub>2</sub>, and (c) Pt<sub>SA</sub>, P/np-MoS<sub>2</sub>.

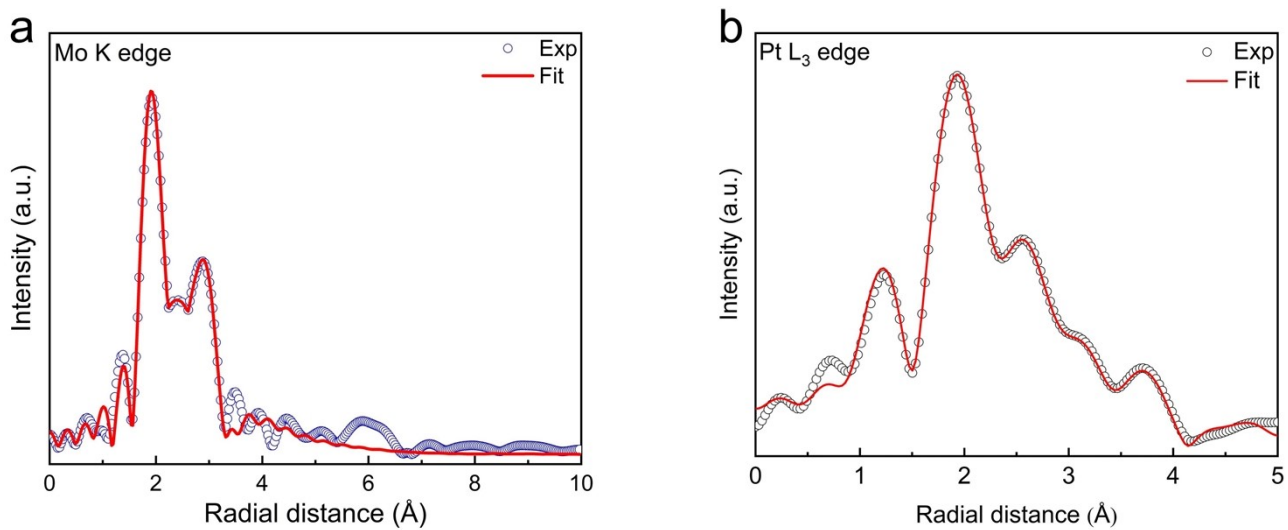

7  
8 **Figure S9.** The fitting FT-EXAFS of (a) Mo K-edge and (b) Pt L<sub>3</sub>-edge in Pt<sub>SA</sub>, P/np-MoS<sub>2</sub> with the  
9 different fitting paths.

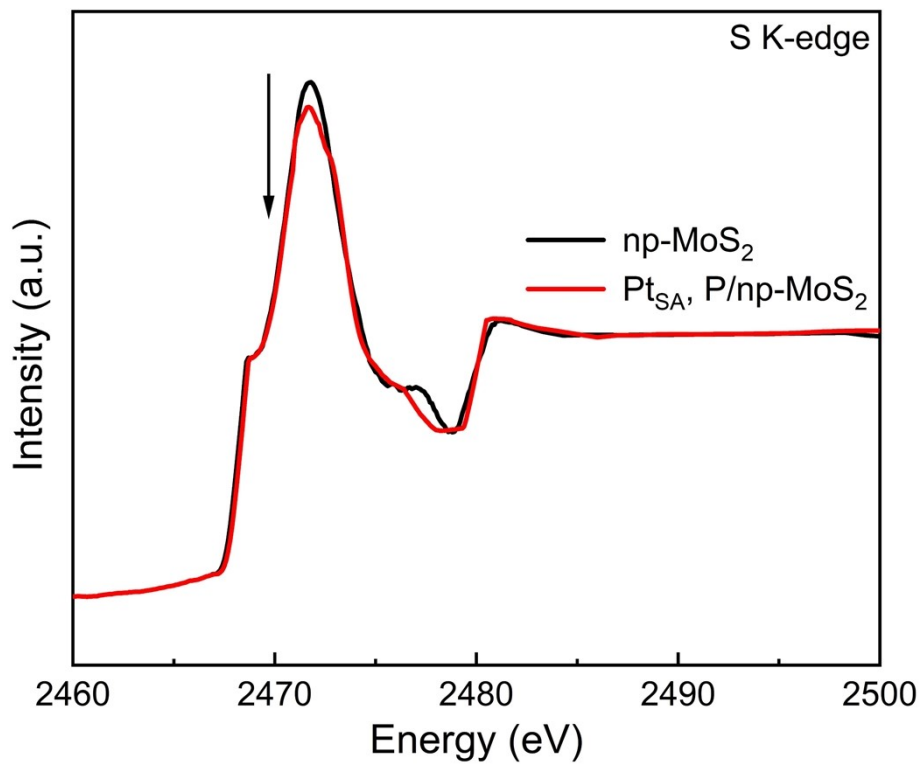

1

2 **Figure S10.** S K-edge XANES spectra of np-MoS<sub>2</sub> and Pt<sub>SA</sub>, P/np-MoS<sub>2</sub>.

3

4

5

6

7

8

9

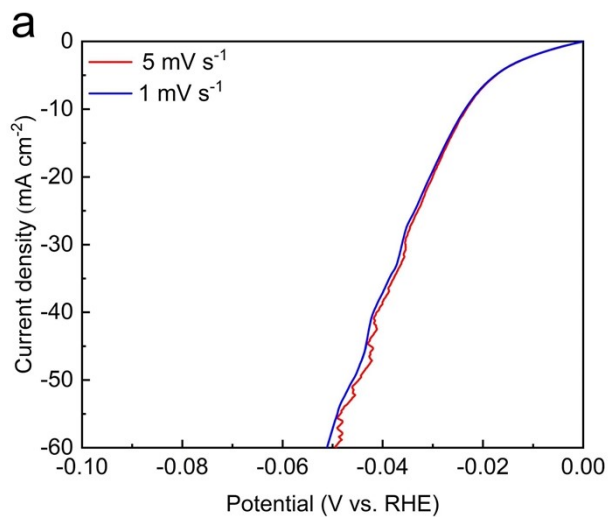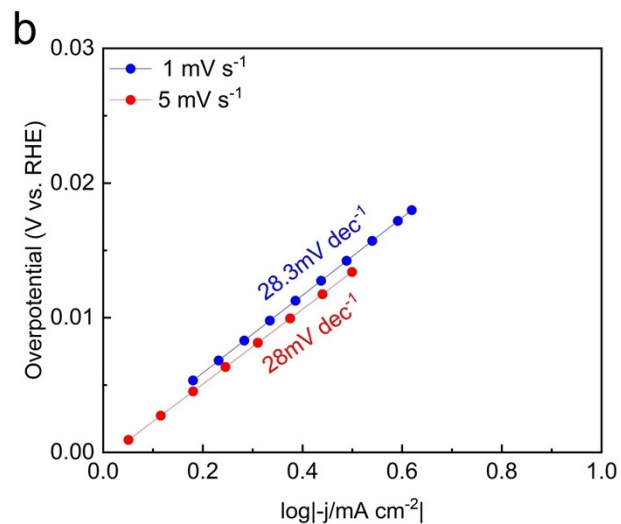

1

2 **Figure S11.** (a) HER polarization curves of Pt<sub>SA</sub>, P/np-MoS<sub>2</sub> at different scan rates. (b) Corresponding Tafel  
 3 plots derived from (a).

4

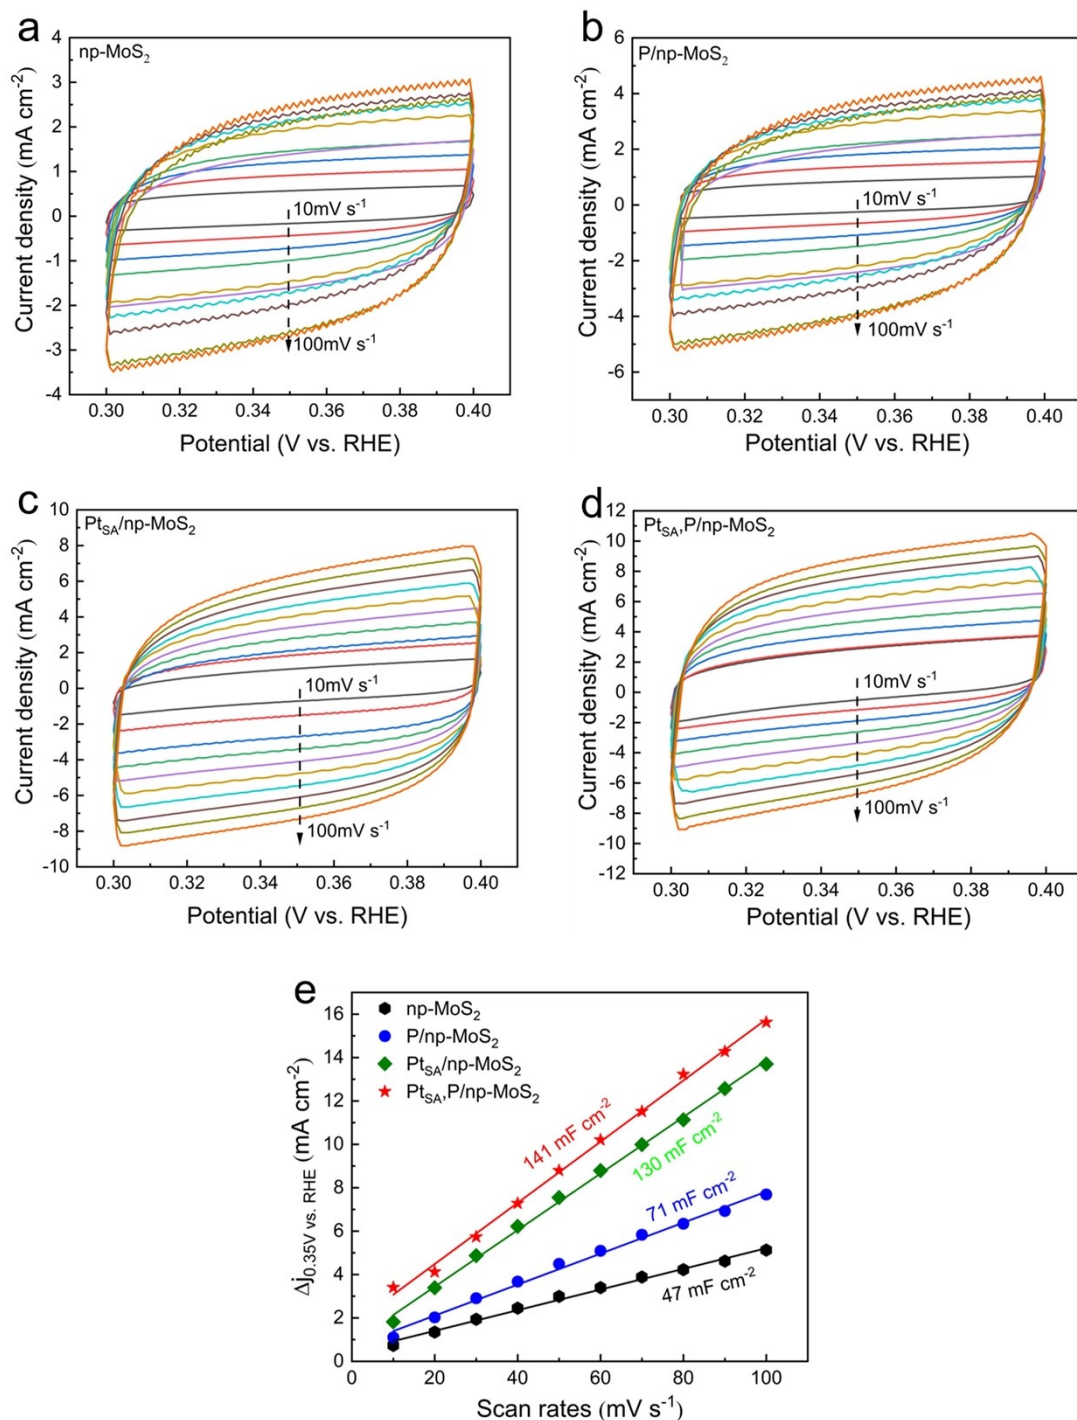

1

2 **Figure S12.** CV curves at various scan rates (10, 20, 30, 40, 50, 60, 70, 80, 90, and 100 mV s<sup>-1</sup>) of (a) np-  
 3 MoS<sub>2</sub>, (b) P/np-MoS<sub>2</sub>, (c) Pt<sub>SA</sub>/np-MoS<sub>2</sub>, (d) Pt<sub>SA</sub>, P/np-MoS<sub>2</sub> in 0.5M H<sub>2</sub>SO<sub>4</sub> solution at the potential range  
 4 of 0.30 to 0.40 V (vs. RHE). (e) The scaling relationship between  $\Delta j$  (the difference between anodic and  
 5 cathodic current densities at 0.35 V) and scan rates for np-MoS<sub>2</sub>, P/np-MoS<sub>2</sub>, Pt<sub>SA</sub>/np-MoS<sub>2</sub>, and Pt<sub>SA</sub>, P/np-  
 6 MoS<sub>2</sub>.

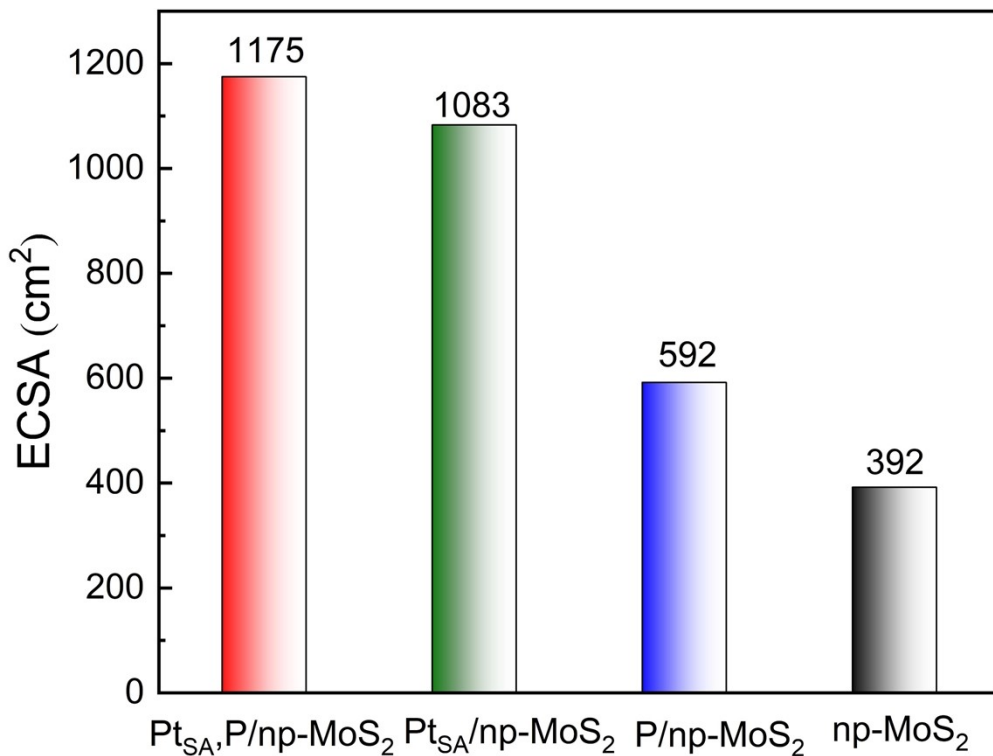

1

2 **Figure S13.** The real ECSA of np-MoS<sub>2</sub>, P/np-MoS<sub>2</sub>, Pt<sub>SA</sub>/np-MoS<sub>2</sub>, and Pt<sub>SA</sub>, P/np-MoS<sub>2</sub>. The ECSA  
 3 value was calculated based on the equation of  $ECSA = C_{dl}/C_s$ , where  $C_s$  is the specific capacitance. In this  
 4 work, the  $C_s$  is assumed as  $60 \mu F cm^{-2}$ .

5

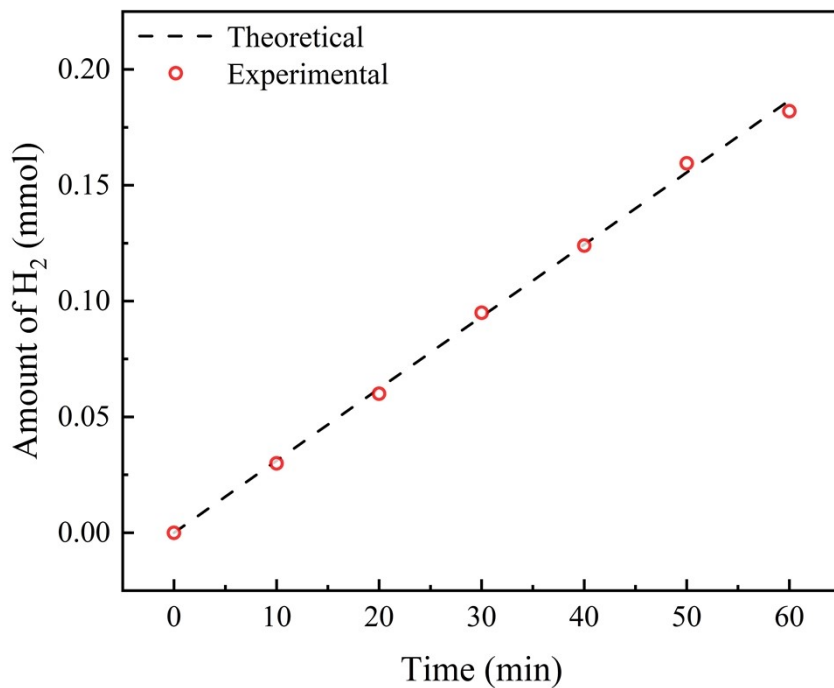

6

7 **Figure S14.** Faradaic efficiency of hydrogen evolution of Pt<sub>SA</sub>, P/np-MoS<sub>2</sub>.

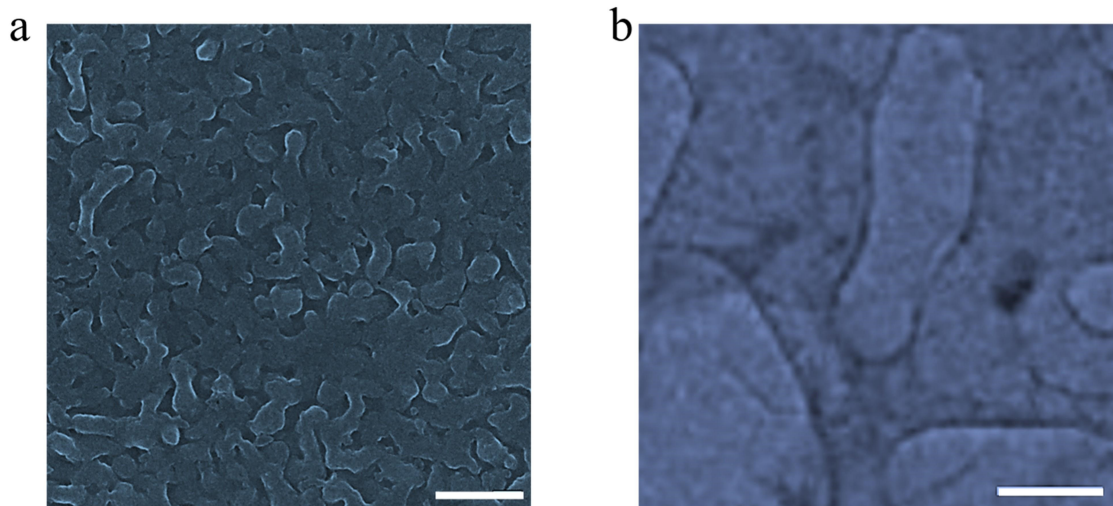

1

2 **Figure S15.** The (a) SEM image and (b) TEM image of Pt<sub>SA</sub>, P/np-MoS<sub>2</sub> after HER test for 100 h. Scale

3 bar: (a) 300 nm (b) 200 nm.

4

5

6

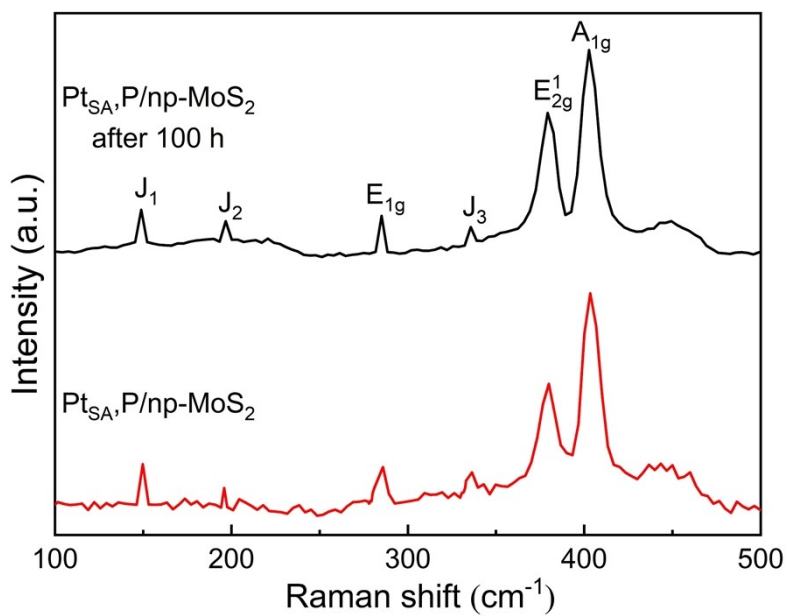

7

8 **Figure S16.** The Raman spectra of initial Pt<sub>SA</sub>, P/np-MoS<sub>2</sub> and Pt<sub>SA</sub>, P/np-MoS<sub>2</sub> after cycling 100 h.

9

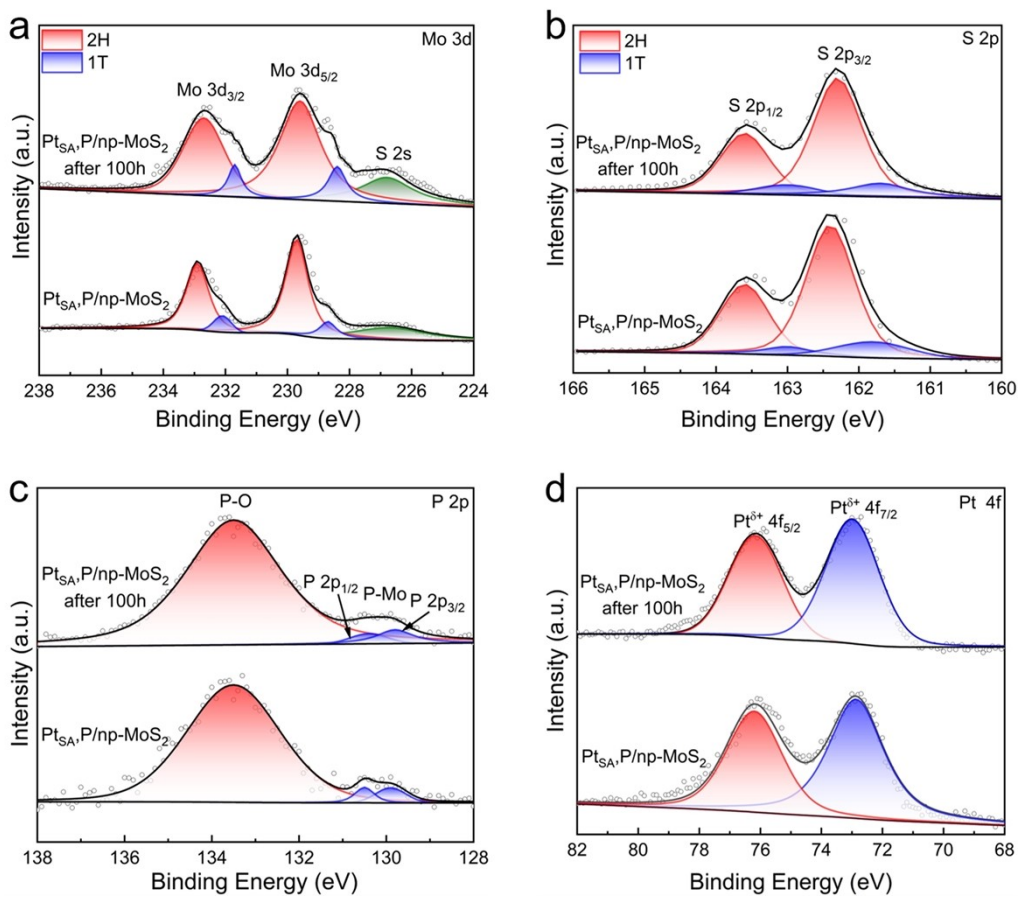

1  
 2 **Figure S17.** High-resolution XPS spectra of initial and final (after cycling 100 h) (a) Mo 3d, (b) S 2p, (c)  
 3 P 2p, and (d) Pt 4f.

4  
 5

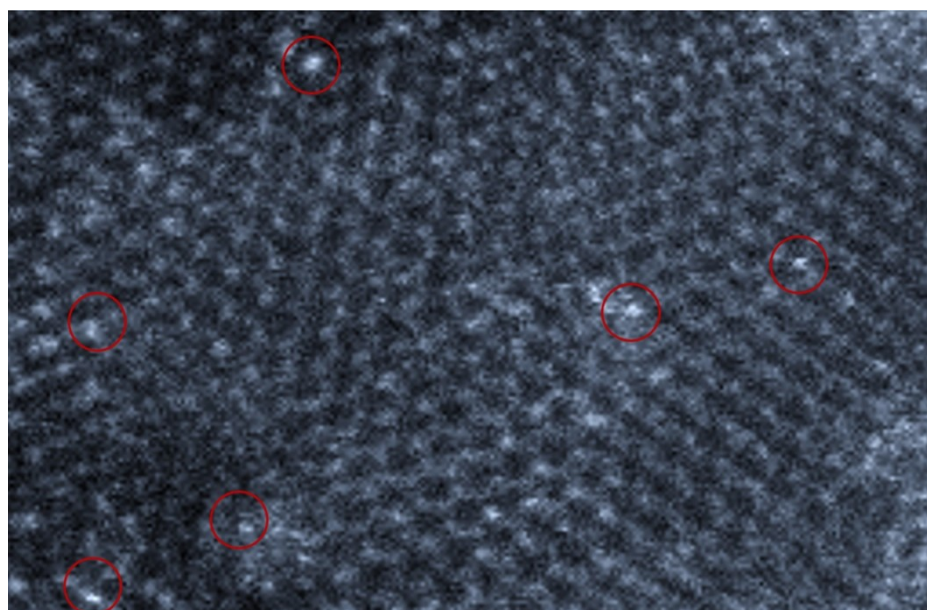

6  
 7 **Figure S18.** Magnified HAADF-STEM image of Pt<sub>SA</sub>, P/np-MoS<sub>2</sub> after cycling 100 h, showing the  
 8 existence of isolated Pt atoms (red circles). Scale bar: 2 nm



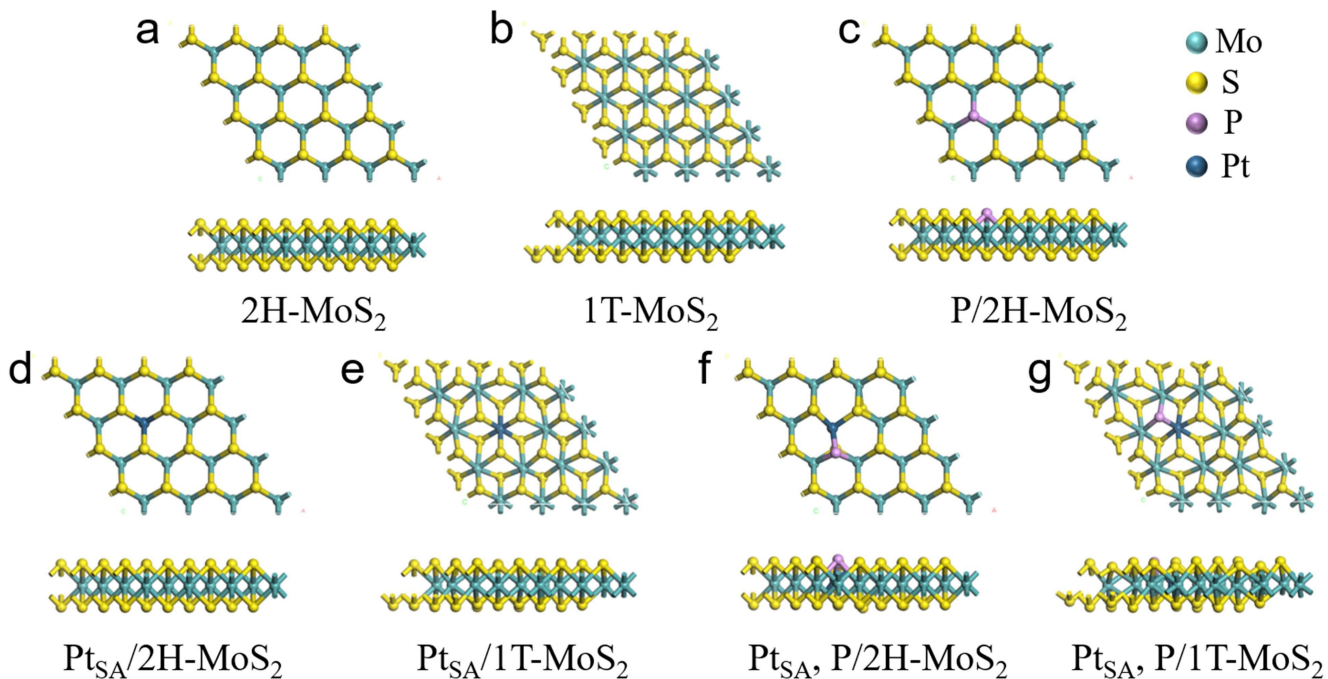

1

2 **Figure S19.** Optimized atomic configurations of top-view and side-view structures of (a) 2H-MoS<sub>2</sub>, (b) 1T-  
 3 MoS<sub>2</sub>, (c) P/2H-MoS<sub>2</sub>, (d) Pt<sub>SA</sub>/2H-MoS<sub>2</sub>, (e) Pt<sub>SA</sub>/1T-MoS<sub>2</sub>, (f) Pt<sub>SA</sub>, P/2H-MoS<sub>2</sub>, (g) Pt<sub>SA</sub>, P/1T-MoS<sub>2</sub>.

4

5

6

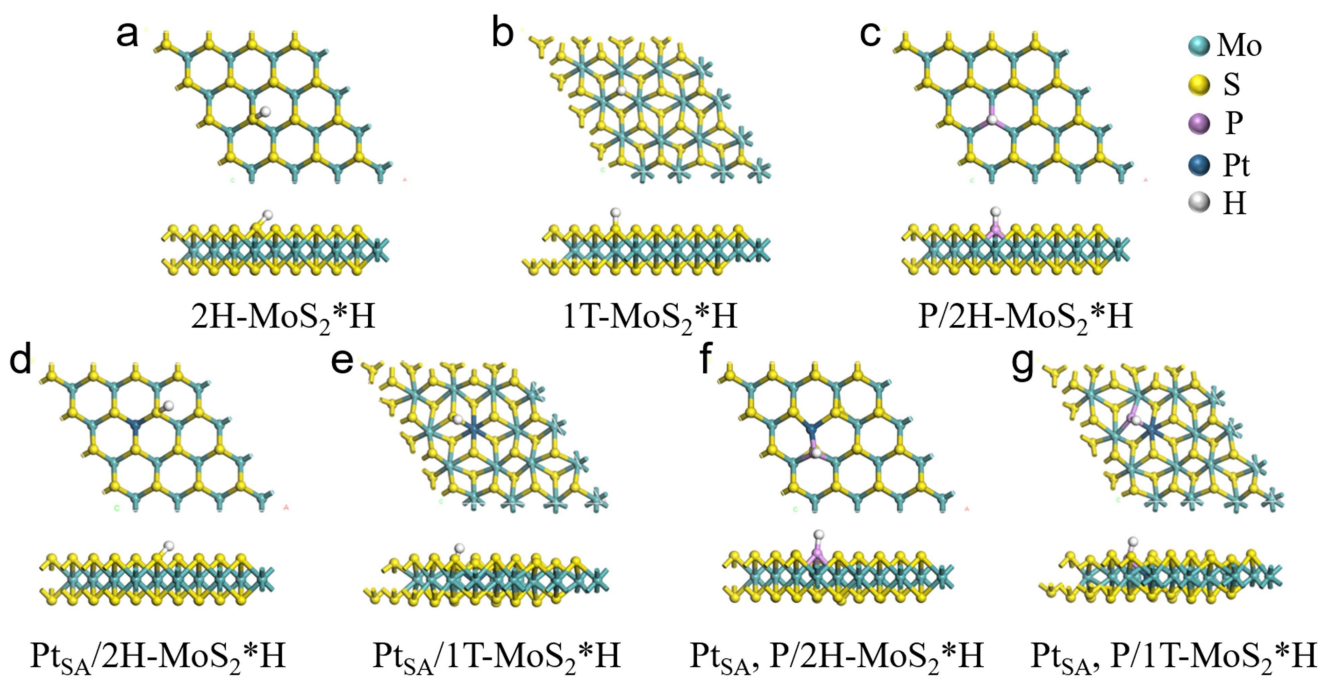

7

8 **Figure S20.** H\* adsorption on (a) 2H-MoS<sub>2</sub>, (b) 1T-MoS<sub>2</sub>, (c) P/2H-MoS<sub>2</sub>, (d) Pt<sub>SA</sub>/2H-MoS<sub>2</sub>, (e) Pt<sub>SA</sub>/1T-  
 9 MoS<sub>2</sub>, (f) Pt<sub>SA</sub>, P/2H-MoS<sub>2</sub>, (g) Pt<sub>SA</sub>, P/1T-MoS<sub>2</sub>.

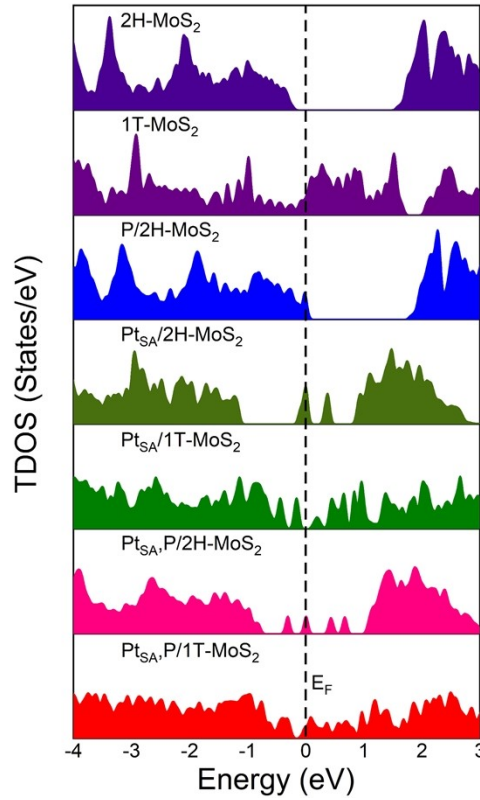

1

2 **Figure S21.** TDOS distribution of 2H-MoS<sub>2</sub>, 1T-MoS<sub>2</sub>, P/2H-MoS<sub>2</sub>, Pt<sub>SA</sub>/2H-MoS<sub>2</sub>, Pt<sub>SA</sub>/1T-MoS<sub>2</sub>, Pt<sub>SA</sub>,  
 3 P/2H-MoS<sub>2</sub>, Pt<sub>SA</sub>, P/1T-MoS<sub>2</sub>.

4

5 **Table S1.** The atomic ratio and weight ratio data of all elements in np-MoS<sub>2</sub>, P/np-MoS<sub>2</sub>, Pt<sub>SA</sub>/np-MoS<sub>2</sub>,  
 6 and Pt<sub>SA</sub>, P/np-MoS<sub>2</sub> from XPS result.

| Catalysts | np-MoS <sub>2</sub> |       | P/np-MoS <sub>2</sub> |       |       | Pt <sub>SA</sub> /np-MoS <sub>2</sub> |       |       | Pt <sub>SA</sub> , P/np-MoS <sub>2</sub> |      |       |       |
|-----------|---------------------|-------|-----------------------|-------|-------|---------------------------------------|-------|-------|------------------------------------------|------|-------|-------|
|           | Mo                  | S     | P                     | Mo    | S     | Pt                                    | Mo    | S     | Pt                                       | P    | Mo    | S     |
| Atomic %  | 34.56               | 65.44 | 7.12                  | 33.24 | 59.64 | 0.74                                  | 34.15 | 65.11 | 0.74                                     | 6.94 | 32.07 | 60.25 |
| Weight %  | 61.25               | 48.75 | 4.14                  | 59.93 | 35.93 | 2.62                                  | 59.48 | 37.90 | 2.69                                     | 4.00 | 57.32 | 35.99 |

7

8 **Table S2.** Structural parameters extracted from the EXAFS fitting of Pt<sub>SA</sub>, P/np-MoS<sub>2</sub>.

| Catalysts                                       | Scattering path | CN   | R (Å) | $\sigma^2(10^{-3} \text{Å}^2)$ | $\Delta E_0$ (eV) | R-factor |
|-------------------------------------------------|-----------------|------|-------|--------------------------------|-------------------|----------|
| Pt <sub>SA</sub> ,<br>P/np-<br>MoS <sub>2</sub> | Mo-S            | 5.49 | 2.41  | 3.18                           | 3.82              | 0.01     |
|                                                 | Mo-P            | 5.23 | 2.52  | 3.06                           | 3.15              | 0.01     |
|                                                 | Mo-Mo           | 6.21 | 3.17  | 4.24                           | 1.56              | 0.01     |

|                                                 |        |     |      |      |       |        |
|-------------------------------------------------|--------|-----|------|------|-------|--------|
| Pt <sub>SA</sub> ,<br>P/np-<br>MoS <sub>2</sub> | Pt-P/S | 3.6 | 2.09 | 5.13 | 4.064 | 0.0053 |
|-------------------------------------------------|--------|-----|------|------|-------|--------|

1 Note: CN represents the coordination number; R represents the interatomic distance;  $\sigma^2$  represents the  
2 Debye-Waller factor;  $\Delta E_0$  represents the edge-energy shift.

3

4 **Table S3.** Comparison of overpotential at 10 mA cm<sup>-2</sup> and Tafel slope of Pt<sub>SA</sub>, P/np-MoS<sub>2</sub> with recently  
5 reported MoS<sub>2</sub>-based catalysts in 0.5 M H<sub>2</sub>SO<sub>4</sub>.

| Catalysts                                | Electrolyte                          | $\eta@10mA$<br>cm <sup>-2</sup> (mV) | Tafel slope<br>(mV dec <sup>-1</sup> ) | Reference          |
|------------------------------------------|--------------------------------------|--------------------------------------|----------------------------------------|--------------------|
| Pt <sub>SA</sub> , P/np-MoS <sub>2</sub> | 0.5 M H <sub>2</sub> SO <sub>4</sub> | 30                                   | 29                                     | This work          |
| MCM@MoS <sub>2</sub> -Ni                 | 0.5 M H <sub>2</sub> SO <sub>4</sub> | 53                                   | 81                                     | (6) <sup>14</sup>  |
| CoS <sub>2</sub> @WS <sub>2</sub> /CC    | 0.5 M H <sub>2</sub> SO <sub>4</sub> | 97.2                                 | 66.0                                   | (7) <sup>15</sup>  |
| Pd, Re-MoS <sub>2</sub>                  | 0.5 M H <sub>2</sub> SO <sub>4</sub> | 46                                   | 72                                     | (8) <sup>16</sup>  |
| Cu-Pd-MoS <sub>2</sub>                   | 0.5 M H <sub>2</sub> SO <sub>4</sub> | 93                                   | 74                                     | (9) <sup>17</sup>  |
| P, Se-MoS <sub>2</sub> /CNTs             | 0.5 M H <sub>2</sub> SO <sub>4</sub> | 110                                  | 49                                     | (10) <sup>18</sup> |
| 1% Pd-MoS <sub>2</sub> /CC               | 0.5 M H <sub>2</sub> SO <sub>4</sub> | 78                                   | 62                                     | (11) <sup>19</sup> |
| Pt@MoS <sub>2</sub>                      | 0.5 M H <sub>2</sub> SO <sub>4</sub> | 88.43                                | 55.69                                  | (12) <sup>20</sup> |
| MoS <sub>2</sub> ML                      | 0.5 M H <sub>2</sub> SO <sub>4</sub> | 90                                   | 94                                     | (13) <sup>21</sup> |

|                                           |                                      |      |       |                    |
|-------------------------------------------|--------------------------------------|------|-------|--------------------|
| MoS <sub>2</sub> /Graphene                | 0.5 M H <sub>2</sub> SO <sub>4</sub> | 110  | 67.4  | (14) <sup>22</sup> |
| Ni <sub>2</sub> P/MoS <sub>2</sub> /N:RGO | 0.5 M H <sub>2</sub> SO <sub>4</sub> | 39.5 | 39.52 | (15) <sup>23</sup> |
| P-MoS <sub>2</sub> @HCMF                  | 0.5 M H <sub>2</sub> SO <sub>4</sub> | 86   | 42.35 | (16) <sup>24</sup> |
| MoS <sub>2</sub> @Pt-3                    | 0.5 M H <sub>2</sub> SO <sub>4</sub> | 70   | 36    | (17) <sup>25</sup> |
| CoFe@NDC@MoS <sub>2</sub>                 | 0.5 M H <sub>2</sub> SO <sub>4</sub> | 64   | 45    | (18) <sup>26</sup> |

1

## 2 References

- 3 1. Y. Tan, P. Liu, L. Chen, W. Cong, Y. Ito, J. Han, X. Guo, Z. Tang, T. Fujita, A. Hirata and M. W.  
4 Chen, *Adv. Mater.*, 2014, **26**, 8023-8028.
- 5 2. D. Chen, Z. Wei, M. Wang, S. Zhao, P. Liu, A. Pan and Y. Tan, *Nano Lett.*, 2022, **22**, 7020-7027.
- 6 3. Y.-C. Chen, A.-Y. Lu, P. Lu, X. Yang, C.-M. Jiang, M. Mariano, B. Kaehr, O. Lin, A. Taylor, I. D.  
7 Sharp, L.-J. Li, S. S. Chou and V. Tung, *Adv. Mater.*, 2017, **29**, 1703863.
- 8 4. D. Voiry, R. Fullon, J. Yang, C. de Carvalho Castro e Silva, R. Kappera, I. Bozkurt, D. Kaplan, M.  
9 J. Lagos, P. E. Batson, G. Gupta, Aditya D. Mohite, L. Dong, D. Er, V. B. Shenoy, T. Asefa and  
10 M. Chhowalla, *Nat Mater*, 2016, **15**, 1003-1009.
- 11 5. S. Anantharaj, S. Noda, M. Driess and P. W. Menezes, *Acs Energy Lett*, 2021, **6**, 1607-1611.
- 12 6. D. Chen, R. Lu, R. Yu, Y. Dai, H. Zhao, D. Wu, P. Wang, J. Zhu, Z. Pu, L. Chen, J. Yu and S. Mu,  
13 *Angew. Chem. Int. Ed.*, 2022, **61**, e202208642.
- 14 7. J. Li, Y. Li, J. Wang, C. Zhang, H. Ma, C. Zhu, D. Fan, Z. Guo, M. Xu, Y. Wang and H. Ma, *Adv.*  
15 *Funct. Mater.*, 2022, **32**, 2109439.

- 1 8. G. Kresse and J. Furthmüller, *Phys. Rev. B*, 1996, **54**, 11169.
- 2 9. J. P. Perdew, K. Burke and M. Ernzerhof, *Phys. Rev. Lett.*, 1996, **77**, 3865.
- 3 10. P. E. Blöchl, *Phys. Rev. B*, 1994, **50**, 17953-17979.
- 4 11. G. Kresse and D. Joubert, *Phys. Rev. B*, 1999, **59**, 1758.
- 5 12. S. Grimme, J. Antony, S. Ehrlich and H. Krieg, *J. Chem. Phys.*, 2010, **132**, 154104.
- 6 13. E. Santos, P. Quaino and W. Schmickler, *Phys. Chem. Chem. Phys.*, 2012, **14**, 11224-11233.
- 7 14. H. B. Zhang, L. Yu, T. Chen, W. Zhou and X. W. Lou, *Adv. Funct. Mater.*, 2018, **28**, 1807086.
- 8 15. X. F. Zhou, X. L. Yang, H. N. Li, M. N. Hedhili, K. W. Huang, L. J. Li and W. J. Zhang, *J. Mater.*  
9 *Chem. A*, 2017, **5**, 15552-15558.
- 10 16. Z. Y. Luo, J. J. Li, Y. L. Li, D. J. Wu, L. Zhang, X. Z. Ren, C. X. He, Q. L. Zhang, M. Gu and X.  
11 L. Sun, *Adv. Energy Mater.*, 2022, **12**, 2103823.
- 12 17. D. C. Han, Z. Y. Luo, Y. Li, N. X. Gao, J. J. Ge, C. P. Liu and W. Xing, *Appl. Surf. Sci.*, 2020,  
13 **529**, 147117.
- 14 18. T. Zhu, J. B. Ding, Q. Shao, Y. Qian and X. Q. Huang, *Chemcatchem*, 2019, **11**, 689-692.
- 15 19. Z. Y. Luo, Y. X. Ouyang, H. Zhang, M. L. Xiao, J. J. Ge, Z. Jiang, J. L. Wang, D. M. Tang, X. Z.  
16 Cao, C. P. Liu and W. Xing, *Nat. Commun.*, 2018, **9**, 2120.
- 17 20. Y. Li, Q. F. Gu, B. Johannessen, Z. Zheng, C. Li, Y. T. Luo, Z. Y. Zhang, Q. Zhang, H. I. Fan, W.  
18 B. Luo, B. L. Liu, S. X. Dou and H. K. Liu, *Nano Energy*, 2021, **84**, 105898.
- 19 21. J. Qu, Y. Li, F. Li, T. M. Li, X. Y. Wang, Y. Yin, L. B. Ma, O. G. Schmidt and F. Zhu, *Acs Nano*,  
20 2022, **16**, 2921-2927.
- 21 22. L. B. Ma, Y. Hu, G. Y. Zhu, R. P. Chen, T. Chen, H. L. Lu, Y. R. Wang, J. Liang, H. X. Liu, C. Z.  
22 Yan, Z. X. Tie, Z. Jin and J. Liu, *Chem. Mater.*, 2016, **28**, 5733-5742.

- 1 23. M. Kim, M. A. R. Anjum, M. Lee, B. J. Lee and J. S. Lee, *Adv. Funct. Mater.*, 2019, **29**, 1809151.
- 2 24. J. Xiong, J. Li, J. W. Shi, X. L. Zhang, W. W. Cai, Z. H. Yang and H. S. Cheng, *Appl Catal B-*  
3 *Environ*, 2019, **243**, 614-620.
- 4 25. X. Y. Xu, X. F. Dong, Z. J. Bao, R. Wang, J. G. Hu and H. B. Zeng, *J. Mater. Chem. A*, 2017, **5**,  
5 22654-22661.
- 6 26. S. Ali Shah, L. Xu, R. Sayyar, T. Bian, Z. Liu, A. Yuan, X. Shen, I. Khan, A. Ali Tahir and H.  
7 Ullah, *Chem. Eng. J.*, 2022, **428**, 132126.

8
